# Supplementary material for: Efflux Inhibitor Bicalutamide Increases Oral Bioavailability of the Poorly Soluble Efflux Substrate Docetaxel in Co-Amorphous Anti-Cancer Combination Therapy
Source: PubMed Central journal article supplement (PMC6369428; doi:10.3390/molecules24020266), 2019-01-11
Supplement: molecules-24-00266-s001.pdf [file molecules-24-00266-s001.pdf]

## Supplementary data

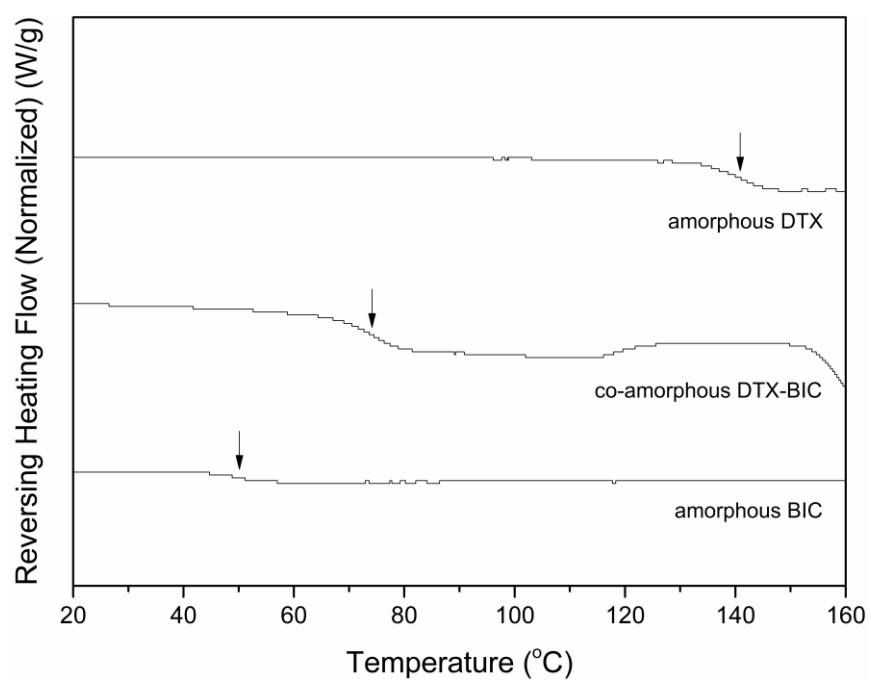

Figure S1: Thermograms of amorphous DTX, amorphous BIC and co-amorphous DTX-BIC after ball milling.
